# Supplementary material for: Negative threshold voltage shift in an a-IGZO thin film transistor under X-ray irradiation
Source: Royal Society of Chemistry journal article supplement (doi:10.1039/c9ra03053k), 2019-01-01
Supplement: c9ra03053k1.pdf [file c9ra03053k1.pdf]

## Supplementary information

# Negative threshold voltage shift in an a-IGZO thin film transistor under X-ray irradiation

Dong-Gyu Kim<sup>a</sup>, Jong-Un Kim<sup>a</sup>, Jun-Sun Lee<sup>a</sup>, Kwon-Shik Park<sup>b</sup>, Youn-Gyoung Chang<sup>b</sup>,  
Myeong-Ho Kim<sup>a\*</sup> and Duck-Kyun Choi<sup>a\*</sup>

<sup>a</sup>Division of Materials Science and Engineering, Hanyang University, 222, Wangsimni-ro, Seongdong-gu, Seoul, Republic of Korea

<sup>b</sup>Research and Development Center, LG Display Co., Ltd., 30, Magokjungang 10-ro, Gangseo-gu, Seoul, Republic of Korea.

Figures S1 (a) and (b) show the XPS spectra of the O1s chemical state before and after X-ray irradiation of an a-IGZO film, respectively. These spectra were deconvoluted through a Gaussian fit. The binding energy peaks reveal fully oxidized oxygen (M-O) at  $529.7 \pm 0.1$  eV, an oxygen vacancy ( $V_O$ ) at  $530.7 \pm 0.1$  eV, and oxygen in the hydroxide state (M-OH) at  $531.7 \pm 0.1$  eV. The peaks related to oxygen vacancy did not change significantly before and after X-ray irradiation, the percentage oxygen vacancies being 25.8% and 26.1% before and after X-ray irradiation, respectively. These results suggest that the cause of increased electron concentration during X-ray irradiation of a-IGZO film is not strongly related to the formation of oxygen vacancies. We estimated these results are attributed to the high permeability of X-ray irradiation with high photon energy.

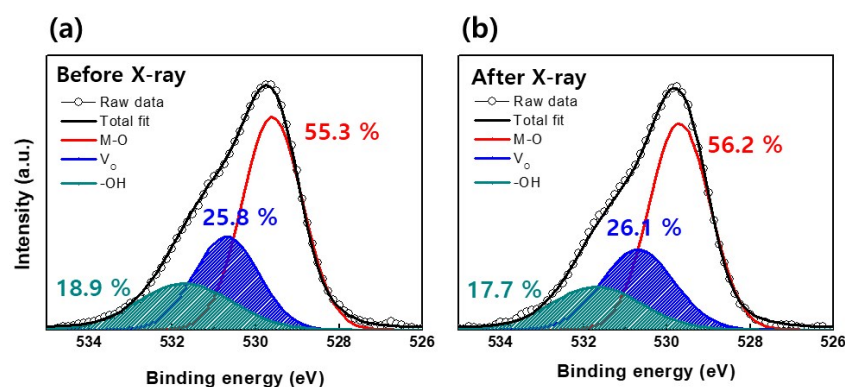

Figure S1. X-ray photoelectron spectroscopy (XPS) spectra of the O1s chemical state for the In-Ga-Zn-O (a-IGZO) film (a) before and (b) after X-ray irradiation. The binding energy states are related to fully oxidized oxygen ( $529.7 \pm 0.1$  eV), oxygen vacancy ( $530.7 \pm 0.1$  eV), and hydroxide ( $531.7 \pm 0.1$  eV), with the three binding states deconvoluted by Gaussian fits.
